# Supplementary material
Source: PubMed Central journal article supplement (PMC6547247)
Supplement: jamaoncol-5-1020-s002.pdf [file jamaoncol-5-1020-s002.pdf]

## Supplementary Online Content

Murphy JE, Wo JY, Ryan DP, et al. Total neoadjuvant therapy with FOLFIRINOX in combination with losartan followed by chemoradiotherapy for locally advanced pancreatic cancer: a phase 2 clinical trial. *JAMA Oncol*. Published online May 30, 2019. doi:10.1001/jamaoncol.2019.0892

**eTable 1.** Pathologic characteristics at surgery (N=34 resected patients)

**eTable 2.** Progression-free survival (PFS) and overall survival (OS)

This supplementary material has been provided by the authors to give readers additional information about their work.

**eTable 1.** Pathologic characteristics at surgery (N=34 resected patients)

| Characteristics                                        | N (%)     |
|--------------------------------------------------------|-----------|
| Resection procedure                                    |           |
| Whipple                                                | 23 (68%)  |
| Distal pancreatectomy                                  | 11 (32%)  |
| Tumor size (cm)*                                       |           |
| Median                                                 | 1.8       |
| Range                                                  | 0.0 - 6.2 |
| Perineural invasion                                    |           |
| No                                                     | 17 (50%)  |
| Yes                                                    | 17 (50%)  |
| Lymphovascular invasion                                |           |
| No                                                     | 30 (88%)  |
| Yes                                                    | 4 (12%)   |
| Margin status                                          |           |
| Negative                                               | 30 (88%)  |
| Positive                                               | 4 (12%)   |
| Nodal involvement                                      |           |
| No                                                     | 25 (74%)  |
| Yes                                                    | 9 (26%)   |
| Nodes assessed                                         |           |
| Median                                                 | 17        |
| Range                                                  | 3 - 35    |
| Nodes positive (among patients with nodal involvement) |           |
| Median                                                 | 1         |
| Range                                                  | 1 - 2     |

\*Tumor dimensions unspecified in 5 patients due to scattered or microscopic foci

**eTable 2.** Progression-free survival (PFS) and overall survival (OS)

|                    | All Eligible<br>(N=49)       |                              |
|--------------------|------------------------------|------------------------------|
|                    | PFS                          | OS                           |
| Median<br>(95% CI) | 17.5 months<br>(13.9 - 22.7) | 31.4 months<br>(18.1 - 38.5) |
| 1-year<br>(95% CI) | 70.9%<br>(55.0% - 82.1%)     | 84.3%<br>(69.7% - 92.3%)     |
| 2-year<br>(95% CI) | 29.0%<br>(15.1% - 44.6%)     | 57.3%<br>(39.4% - 71.7%)     |
|                    | Resected<br>(N=34)           |                              |
|                    | PFS                          | OS                           |
| Median<br>(95% CI) | 21.3 months<br>(16.6 - 28.2) | 33.0 months<br>(31.4 - NR)   |
| 1-year<br>(95% CI) | 89.6%<br>(70.8% - 96.5%)     | 97.1%<br>(80.9% - 99.6%)     |
| 2-year<br>(95% CI) | 44.2%<br>(23.5% - 63.1%)     | 82.9%<br>(60.0% - 93.4%)     |

NR: not reached
